# Supplementary material
Source: PubMed Central journal article supplement (PMC5675451)
Supplement: develop-144-157750-s1.pdf [file develop-144-157750-s1.pdf]

## Supplementary Figures

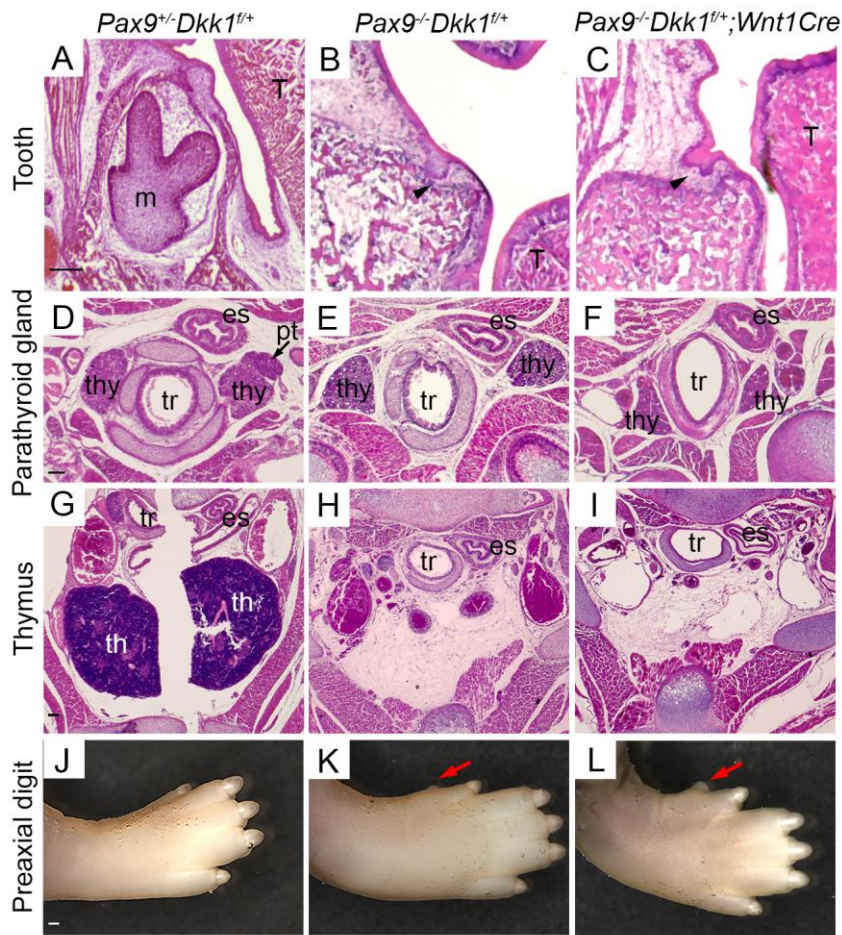

**Figure S1. Reducing *Dkk1* in compound mutants of *Pax9*<sup>-/-</sup>*Dkk1*<sup>f/+</sup>;*Wnt1Cre* failed to rescue the defects of tooth organs, parathyroid glands, thymus and hind limb in *Pax9*<sup>-/-</sup> embryos.** (A-C) H&E staining of sections through developing 1<sup>st</sup> molar in P0 pups. Compared with late bell stage in *Pax9*<sup>+/-</sup>*Dkk1*<sup>f/+</sup> (A), tooth development arrested at bud stage in *Pax9*<sup>-/-</sup>*Dkk1*<sup>f/+</sup> (B, black arrowhead) while the 1<sup>st</sup> molar advanced to early cap stage in *Pax9*<sup>-/-</sup>*Dkk1*<sup>f/+</sup>;*Wnt1Cre* (C, black arrowhead). (D-F) H&E staining of sections through thyroid in P0 embryos. Parathyroid gland is near the dorsolateral border of the thyroid lobe in *Pax9*<sup>+/-</sup>*Dkk1*<sup>f/+</sup> samples (D, black arrow) but missing in *Pax9*<sup>-/-</sup>*Dkk1*<sup>f/+</sup> (E) and *Pax9*<sup>-/-</sup>*Dkk1*<sup>f/+</sup>;*Wnt1Cre* embryos (F). (G-I) H&E staining of sections through thymus position in P0 embryos. Compared with the dark-stained thymus in *Pax9*<sup>+/-</sup>*Dkk1*<sup>f/+</sup> samples (G), *Pax9*<sup>-/-</sup>*Dkk1*<sup>f/+</sup> (H) and *Pax9*<sup>-/-</sup>*Dkk1*<sup>f/+</sup>;*Wnt1Cre* embryos (I) showed lack of thymus. (J-L) The ventral views of hind limb. In comparison

to the normal digits in *Pax9<sup>+/-</sup>Dkk1<sup>f/-</sup>* samples (J), *Pax9<sup>-/-</sup>Dkk1<sup>f/+</sup>* (K) and *Pax9<sup>-/-</sup>Dkk1<sup>f/+</sup>;Wnt1Cre* embryos (L) had extra-formed digit (red arrows in K and L). es, esophagus; m, molar; pt, parathyroid gland; T, tongue; th, thymus; thy, thyroid; tr, trachea. Scale bar represents 100µm.

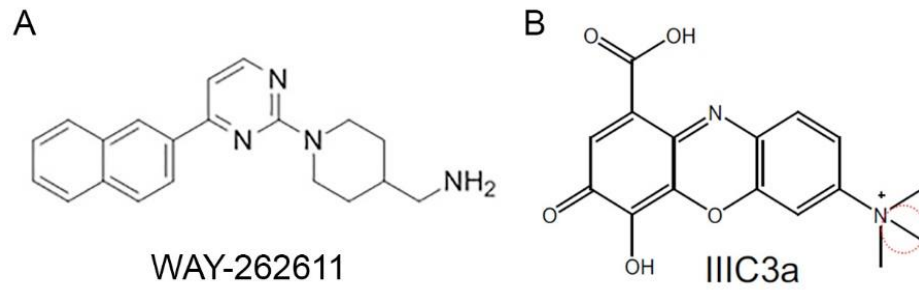

**Figure S2. The structure formula of Wnt agonists used for treatments.** (A) Dkk1 inhibitor, WAY-262611; (B) Dkk inhibitor II, Il1c3a (Pelletier et al., 2009; Li et al., 2012).

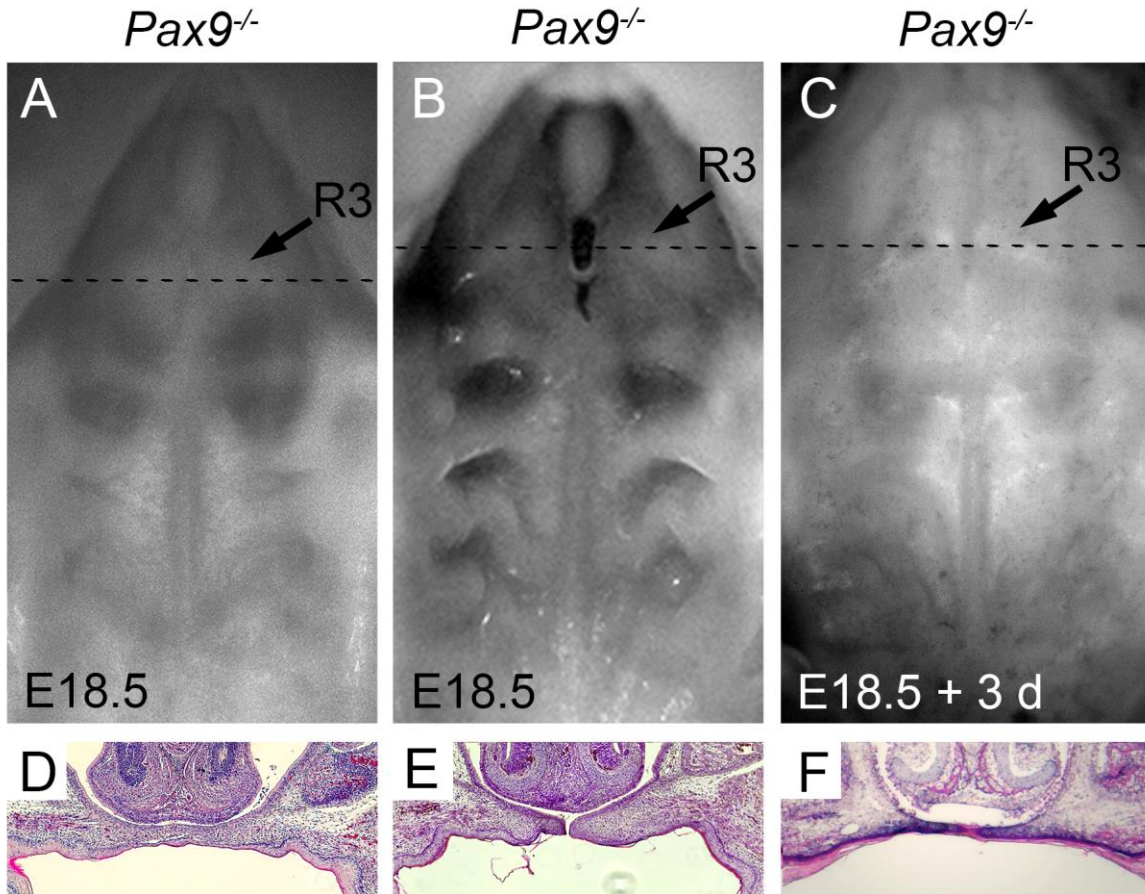

**Figure S3. The residual fusion defects in the treated *Pax9*<sup>-/-</sup> samples were rescued after 3 days of culture.** The whole mount view of palates treated with WAY-262611 *in-utero* (A, B) and with additional 3 days of culture after WAY-262611 *in-utero* treatment (C). 60% (11 in 18) *Pax9*<sup>-/-</sup> embryos showed full closure of palate shelves (A) and 40% (7 in 18) *Pax9*<sup>-/-</sup> embryos showed residual fusion defects between primary and secondary palate (B). The residual fusion defects were resolved *in-vitro* after culture for 3 days (n=5) (C). Dashed line indicates the position of section in D, E, F, respectively. Black arrows point the position of the 3<sup>rd</sup> ruga (R3). HE staining of frontal sections through palates showed fully closure (D), small gap at the 3<sup>rd</sup> ruga (E) and the gap disappeared after 3 days of culture (F).

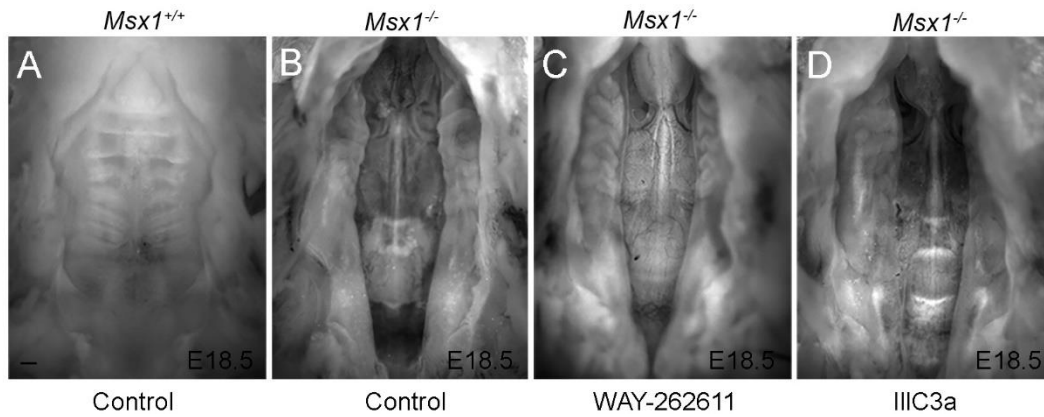

**Figure S4. The treatments with Wnt signaling agonists didn't rescue cleft palate in *Msx1*<sup>-/-</sup> embryos.** Compared with intact palate in *Msx1*<sup>+/+</sup> embryo (A), all the *Msx1*<sup>-/-</sup> embryo (B), WAY-262611 treated *Msx1*<sup>-/-</sup> embryos (C, 15 samples) and Il1c3a treated *Msx1*<sup>-/-</sup> embryos (D, 34 samples) showed 100% penetrance of the complete cleft palate.

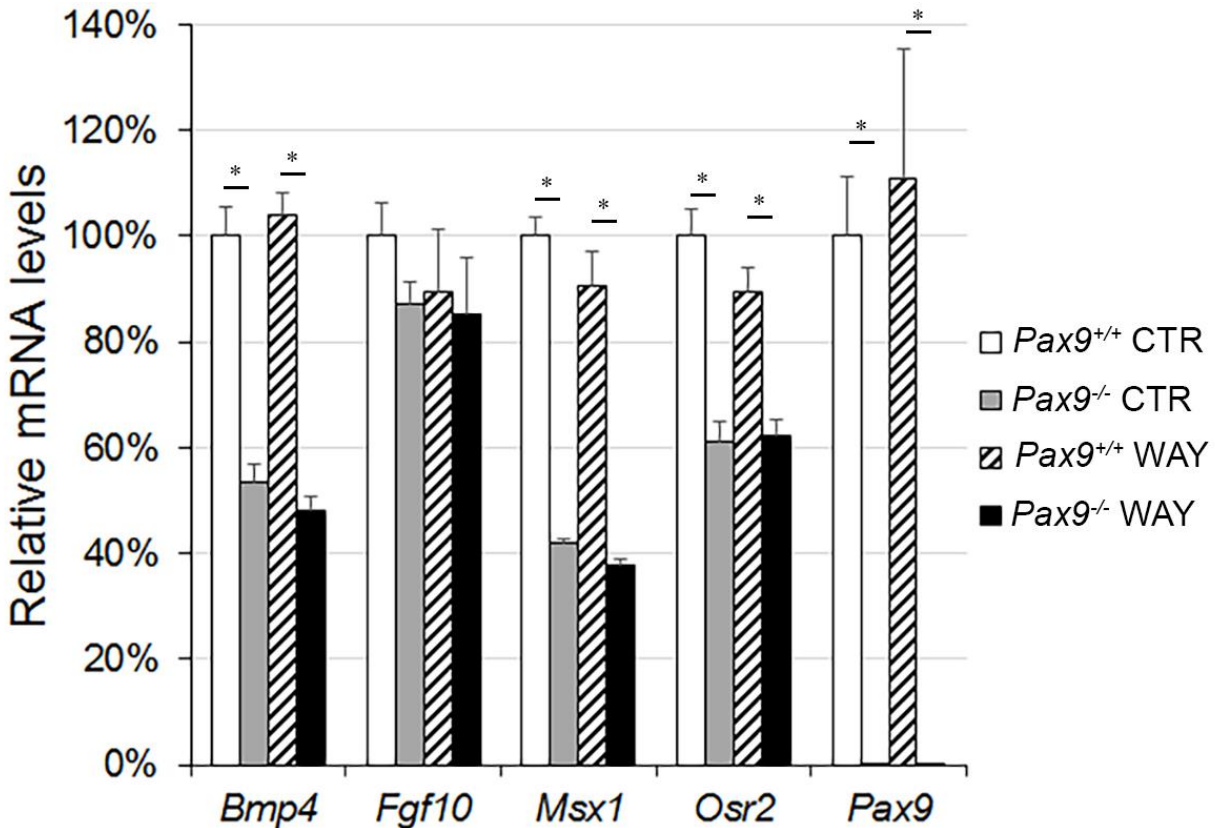

**Figure S5. Quantitative RT-PCR analysis of gene expression of known Pax9 targets from control and WAY-262611 treated groups.** In *Pax9*<sup>-/-</sup> samples, the expression levels of endogenous *Osr2*, *Msx1* and *Bmp4* were significantly reduced while *Fgf10* mRNA was moderately decreased. Treatment with Wnt signaling agonist WAY-262611 did not appear to restore levels of *Bmp4*, *Msx1*, *Fgf10* and *Osr2* expression. Error bars indicate s.e.m., \*  $P < 0.05$ . CTR, control treatment; WAY, WAY-262611 treatment.

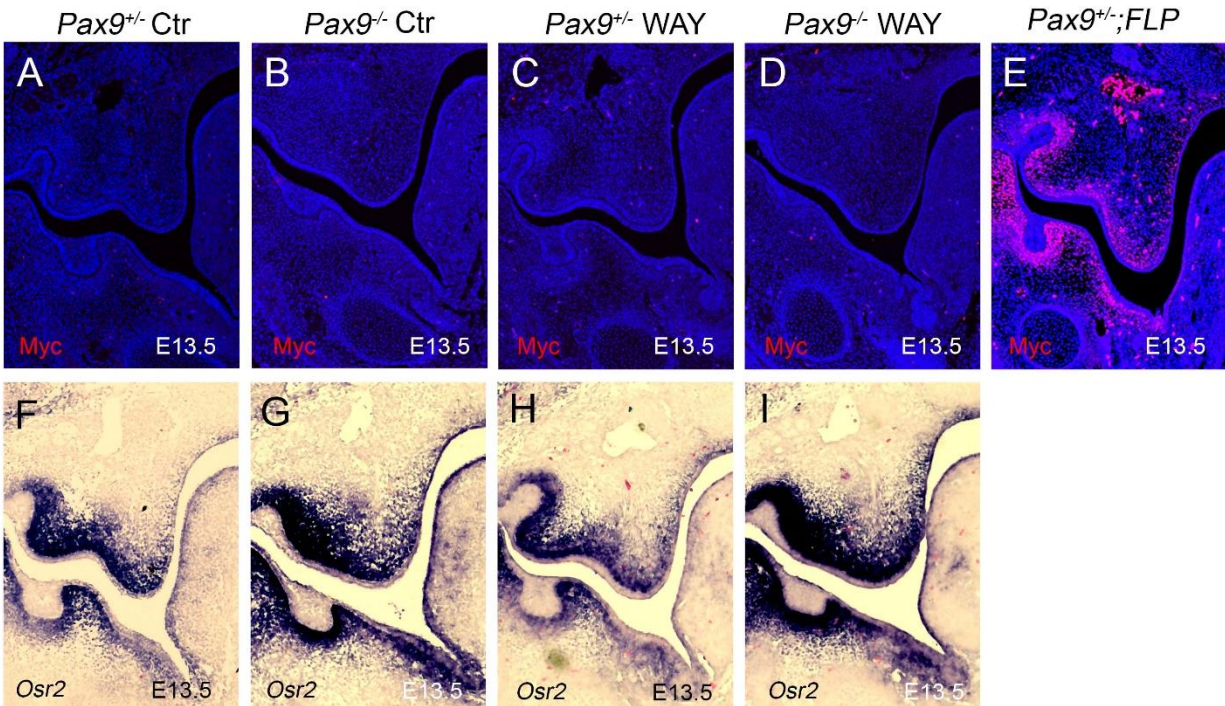

**Figure S6. The knock-in *Myc-Osr2* was not translated into protein in the palate after WAY-262611 treatment.** (A-E) Lack of detection of Myc-Osr2 protein in E13.5 palate frontal sections in WAY-262611 treated embryos using anti-Myc antibody. No Myc-staining was detected in *Pax9*<sup>+/+</sup> or *Pax9*<sup>-/-</sup> samples with control or WAY-262611 treatment (A-D). *Pax9*<sup>+/+</sup>;FLP (also named *Pax9*<sup>Osr2KI</sup> in Zhou et al., 2011) sample was used as the positive control to show the strong and specific Myc-staining, in which samples *Myc-Osr2* was translated into protein (E). (F-I) *In-situ* hybridization in E13.5 palate frontal sections using *Osr2*-specific probe. Though stronger *Osr2* signals were detected in *Pax9*<sup>-/-</sup> samples (G, I) than *Pax9*<sup>+/+</sup> samples (F, H), representing the transcription of extra copy of transgenic *Osr2*, there is no significant increase of *Osr2* expression after WAY-262611 treatment (comparing H with F, I with G). Anti-Myc antibody staining in red and *in-situ* hybridization signals are shown in blue. Ctr, control treatment; WAY, WAY-262611 treatment.

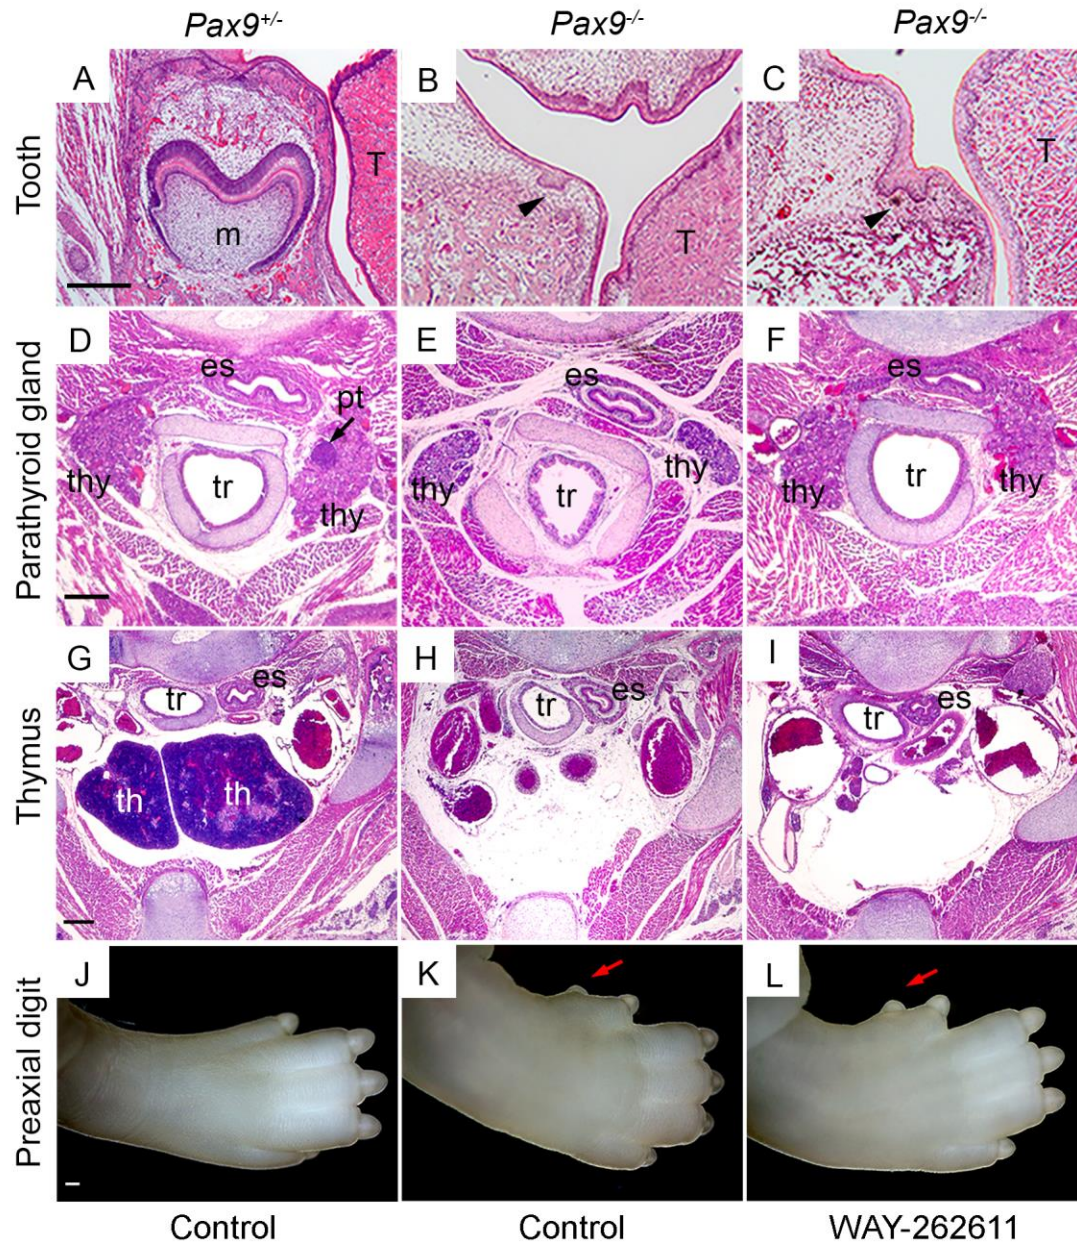

**Figure S7. Wnt agonist therapies failed to rescue the defects of tooth organs, parathyroid glands, thymus, and hind limb in *Pax9*<sup>-/-</sup> embryos.** (A-C) H&E staining of sections through developing 1<sup>st</sup> molar at E18.5. Compared with late bell stage in *Pax9*<sup>+/-</sup> (A), tooth development arrested at bud stage in *Pax9*<sup>-/-</sup> (B, black arrowhead) while the 1<sup>st</sup> molar advanced to early cap stage in WAY-262611 treated *Pax9*<sup>-/-</sup> (C, black arrowhead). (D-F) H&E staining of sections through thyroid of E18.5 embryos. Parathyroid gland is near the dorsolateral border of the thyroid lobe in *Pax9*<sup>+/-</sup> samples (D, black arrow) but missing in *Pax9*<sup>-/-</sup> embryos without (E) or with (F) WAY-262611



treatment. (G-I) H&E staining of sections through thymus position in E18.5 embryos. Compared with the dark-stained thymus in *Pax9*<sup>+/-</sup> samples (G), *Pax9*<sup>-/-</sup> embryos without (H) or with (I) WAY-262611 treatment showed lack of thymus. (J-L) The ventral views of hind limb. In comparison to the normal digits in *Pax9*<sup>+/-</sup> samples (J), *Pax9*<sup>-/-</sup> embryos without (K) or with (L) WAY-262611 treatment had extra-formed digit (red arrows in K and L). es, esophagus; m, molar; pt, parathyroid gland; T, tongue; th, thymus; thy, thyroid; tr, trachea. Scale bar represents 200µm.

**Supplementary Table 1:**  
Primers for Quantitative RT-PCR

| Name              | Sequence                 | Name              | Sequence                |
|-------------------|--------------------------|-------------------|-------------------------|
| <i>Bmp4</i> -QF   | GAGGGATCTTTACCGGCTCC     | <i>Cited1</i> -QF | TCGCTTCGTCCGTACCTCAG    |
| <i>Bmp4</i> -QR   | GTTGAAGAGGAAACGAAAAGCAG  | <i>Cited1</i> -QR | CTCCTGGTTGGCATCCTCCTT   |
| <i>Dkk1</i> -QF   | AACTACCAGCCCTACCCTTG     | <i>Gbx2</i> -QF   | GCAACTTCGACAAAGCCGAG    |
| <i>Dkk1</i> -QR   | TCTGGGATATCCATCCCCCG     | <i>Gbx2</i> -QR   | GACAGCCCCGACGAGC        |
| <i>Dkk2</i> -QF   | TACTCTTCCAAAGCCAGACTCCA  | <i>Fgf4</i> -QF   | AAGCTCTTCGGTGTGCCTTT    |
| <i>Dkk2</i> -QR   | CCTCATTCTTCCGCATTCCA     | <i>Fgf4</i> -QR   | CGGAGGGTCACAGTCTAGGA    |
| <i>Lef1</i> -QF   | GAAATCATCCCAGCCAGCAA     | <i>Phox2b</i> -QF | GTACGCCGCAGTTCCATACA    |
| <i>Lef1</i> -QR   | GGGCATCATTATGTAGCCAGAGTA | <i>Phox2b</i> -QR | CTGCTTGCGAAACTTAGCCC    |
| <i>Tfap2b</i> -QF | TACAGACAGCGGAGTCCTGA     | <i>Hand2</i> -QF  | CACCAGCTACATCGCCTACC    |
| <i>Tfap2b</i> -QR | CATCGTGCCGGTCCTCATAG     | <i>Hand2</i> -QR  | TCTCATTAGCTCTTTCTTCCTCT |
| <i>Msx1</i> -QF   | CGGCCATTTCTCAGTCGG       | <i>Ascl1</i> -QF  | TCTCGTCCTACTCCTCCGAC    |
| <i>Msx1</i> -QR   | CTTGCGGTTGGTCTTGTGC      | <i>Ascl1</i> -QR  | ATTTGACGTCGTTGGCGAGA    |
| <i>Msx2</i> -QF   | ACACCCTTACCACATCCCA      | <i>L1cam</i> -QF  | GCTCCTCATCCTGCTCATCC    |
| <i>Msx2</i> -QR   | TTCCGCCTCTTGCACTTTT      | <i>L1cam</i> -QR  | TCTCCAGGGACCTGTA CTG    |
| <i>Pax9</i> -QF   | TATTCTGCGCAACAAGATCG     | <i>Osr2</i> -QF   | TCTTTACACATCCCGCTTCC    |
| <i>Pax9</i> -QR   | GGTGGTGTAGGCACCTTAGC     | <i>Osr2</i> -QR   | GGAAAGGTCATGAGGTCCAA    |
| <i>Fgf10</i> -QF  | TTTGAGCCATAGAGTTTCCCC    | <i>Gapdh</i> -F   | TGGAGCCAAAAGGGTCA       |
| <i>Fgf10</i> -QR  | CGGGACCAAGAATGAAGACTG    | <i>Gapdh</i> -R   | CTTCTGGGTGGCAGTGA       |
